# Supplementary material for: Optical Absorption, Photocarrier Recombination Dynamics and Terahertz Dielectric Properties of Electron-Irradiated GaSe Crystals
Source: MDPI journal article supplement (doi:10.3390/cryst13111562), 2023-11-01
Supplement: s1 [file s1]

Archive with 1 entries (1 files):
- crystals-2687971-supplementary.pdf
